# Supplementary material
Source: PubMed Central journal article supplement (PMC5504882)

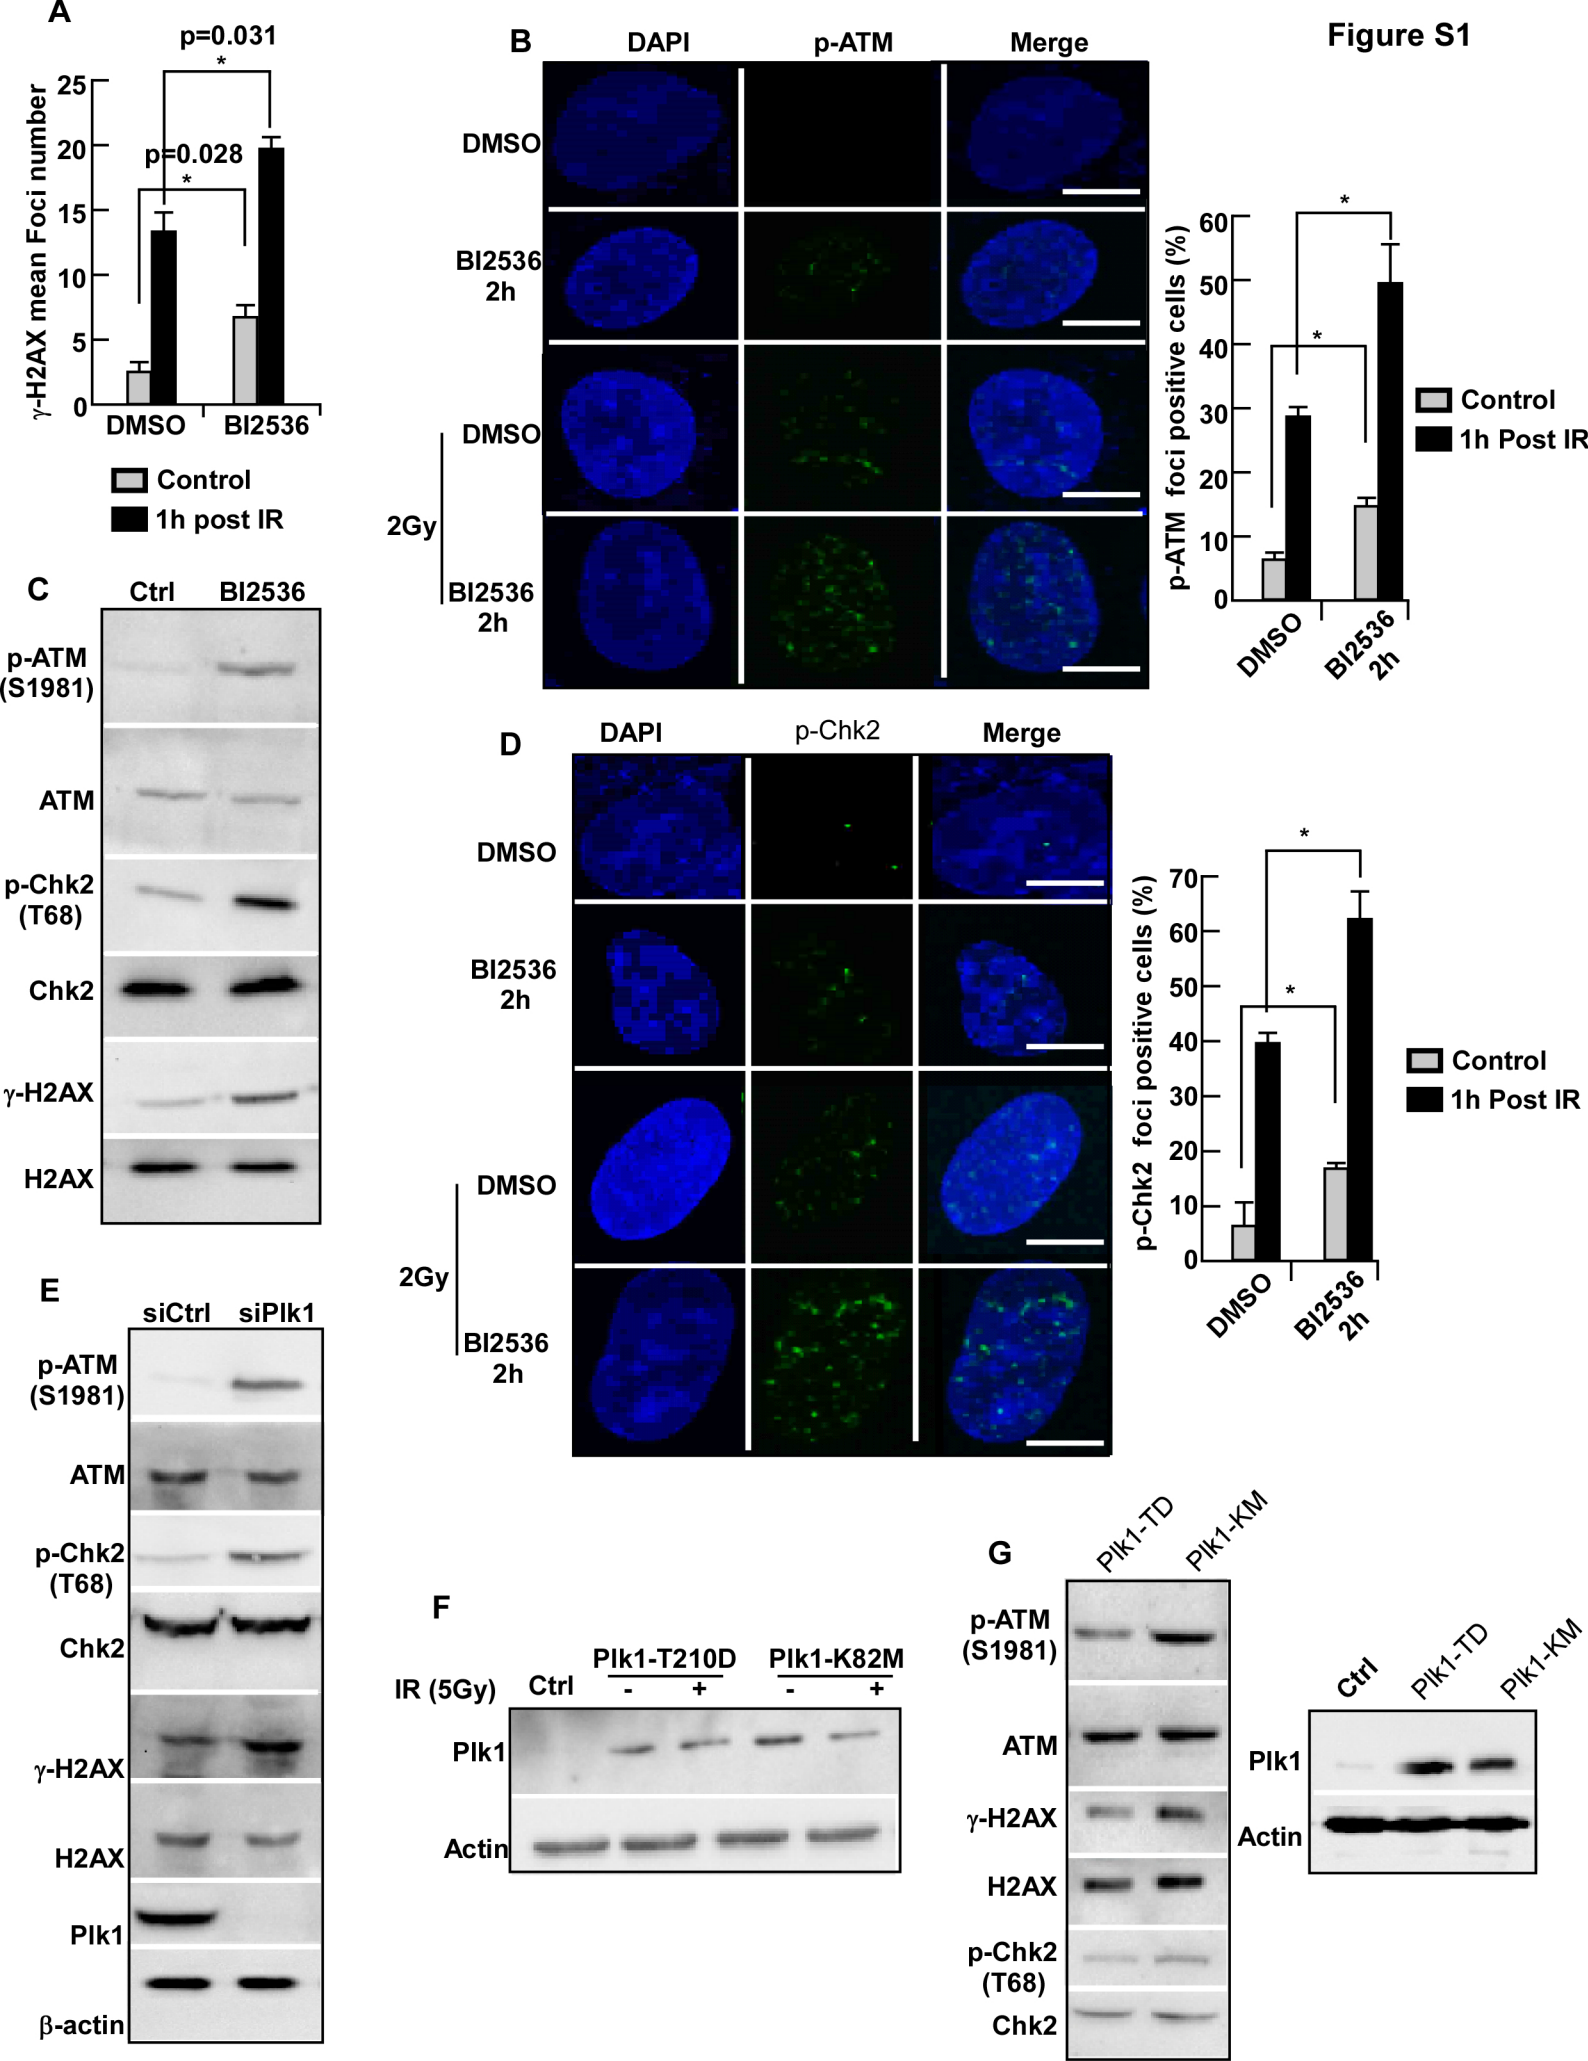

Supplement: NIHMS871843-supplement-2.pdf [file NIHMS871843-supplement-2.pdf]

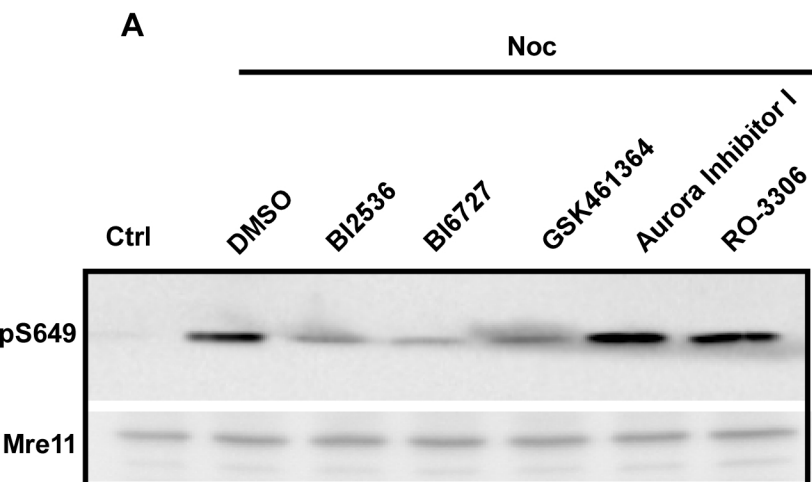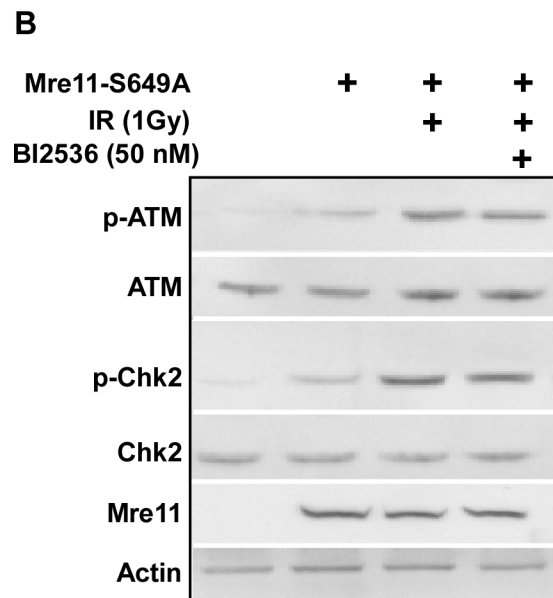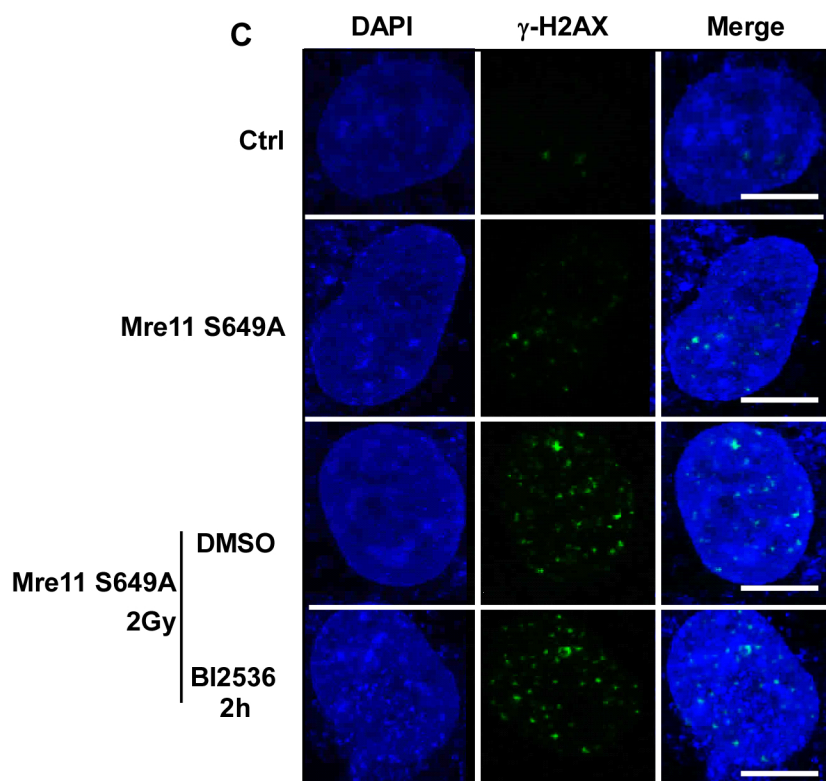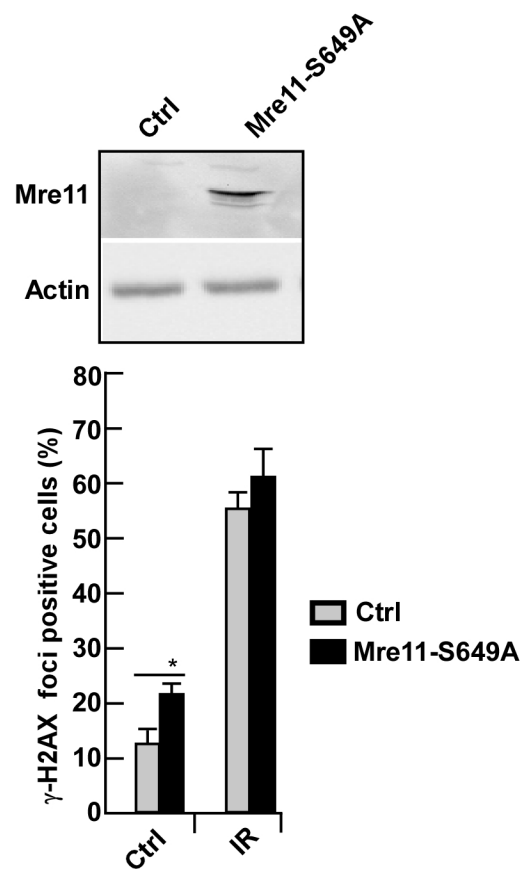

Supplement: NIHMS871843-supplement-3.pdf [file NIHMS871843-supplement-3.pdf]

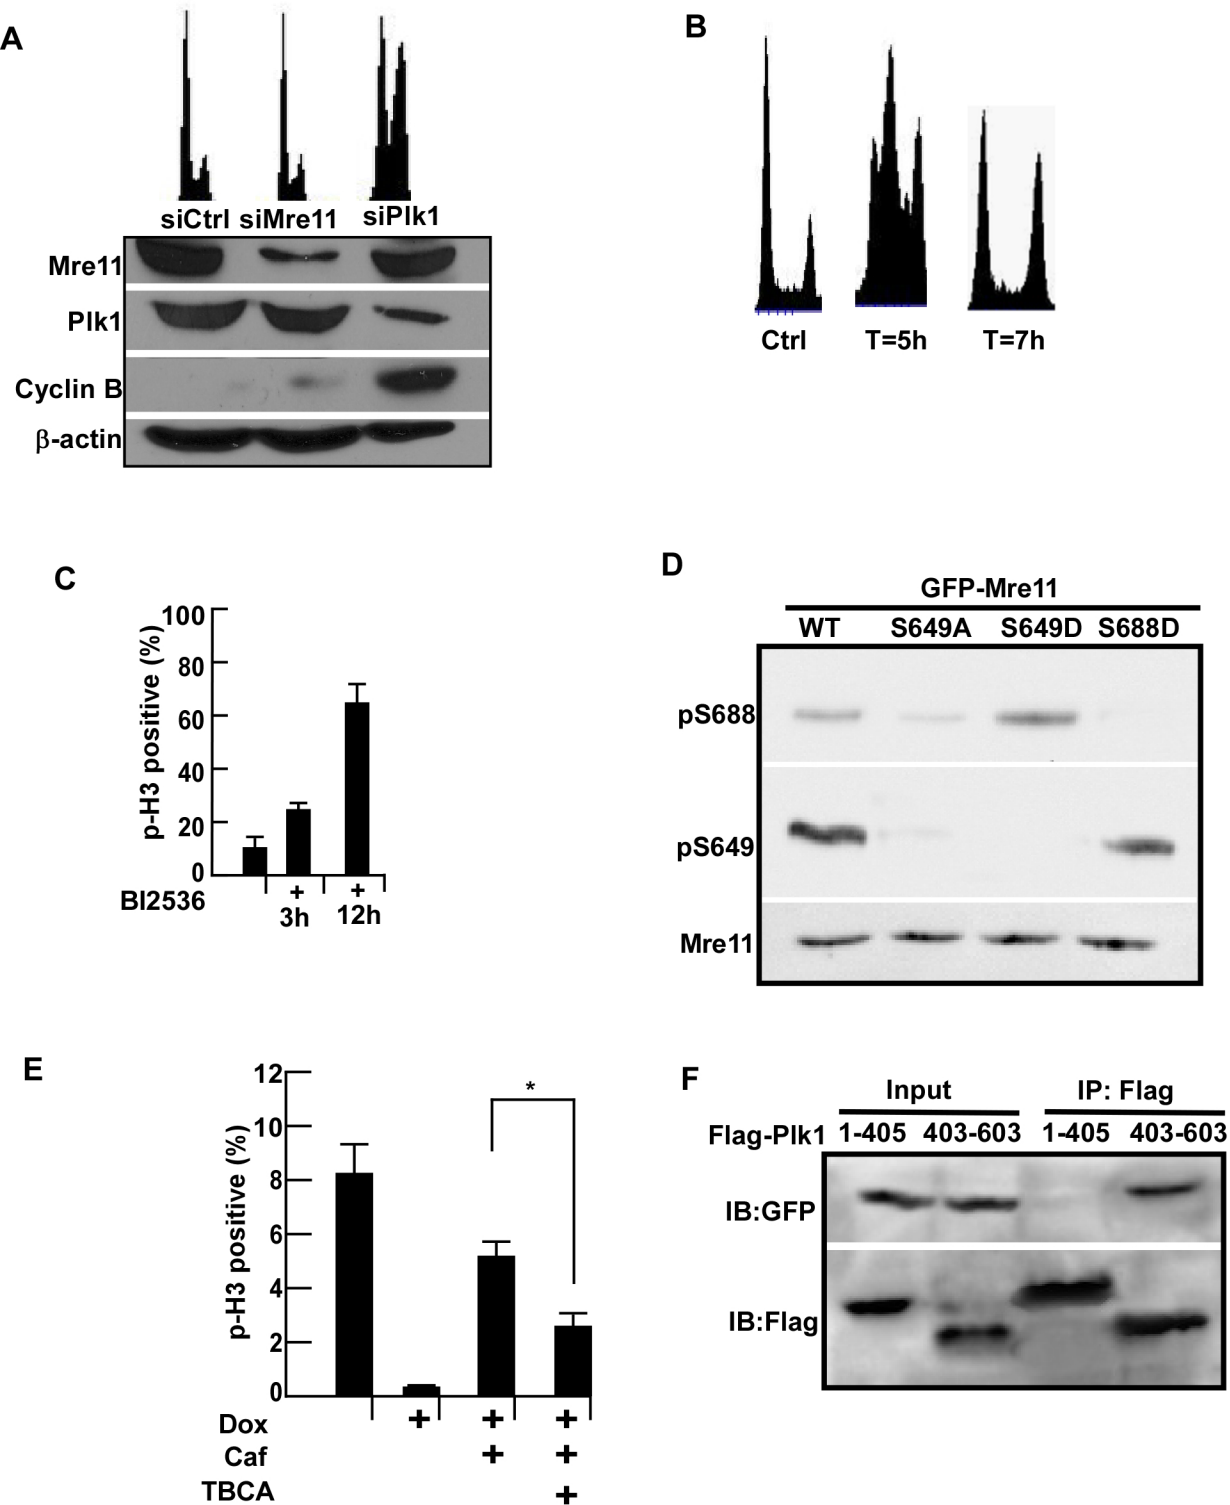

Supplement: NIHMS871843-supplement-4.pdf [file NIHMS871843-supplement-4.pdf]

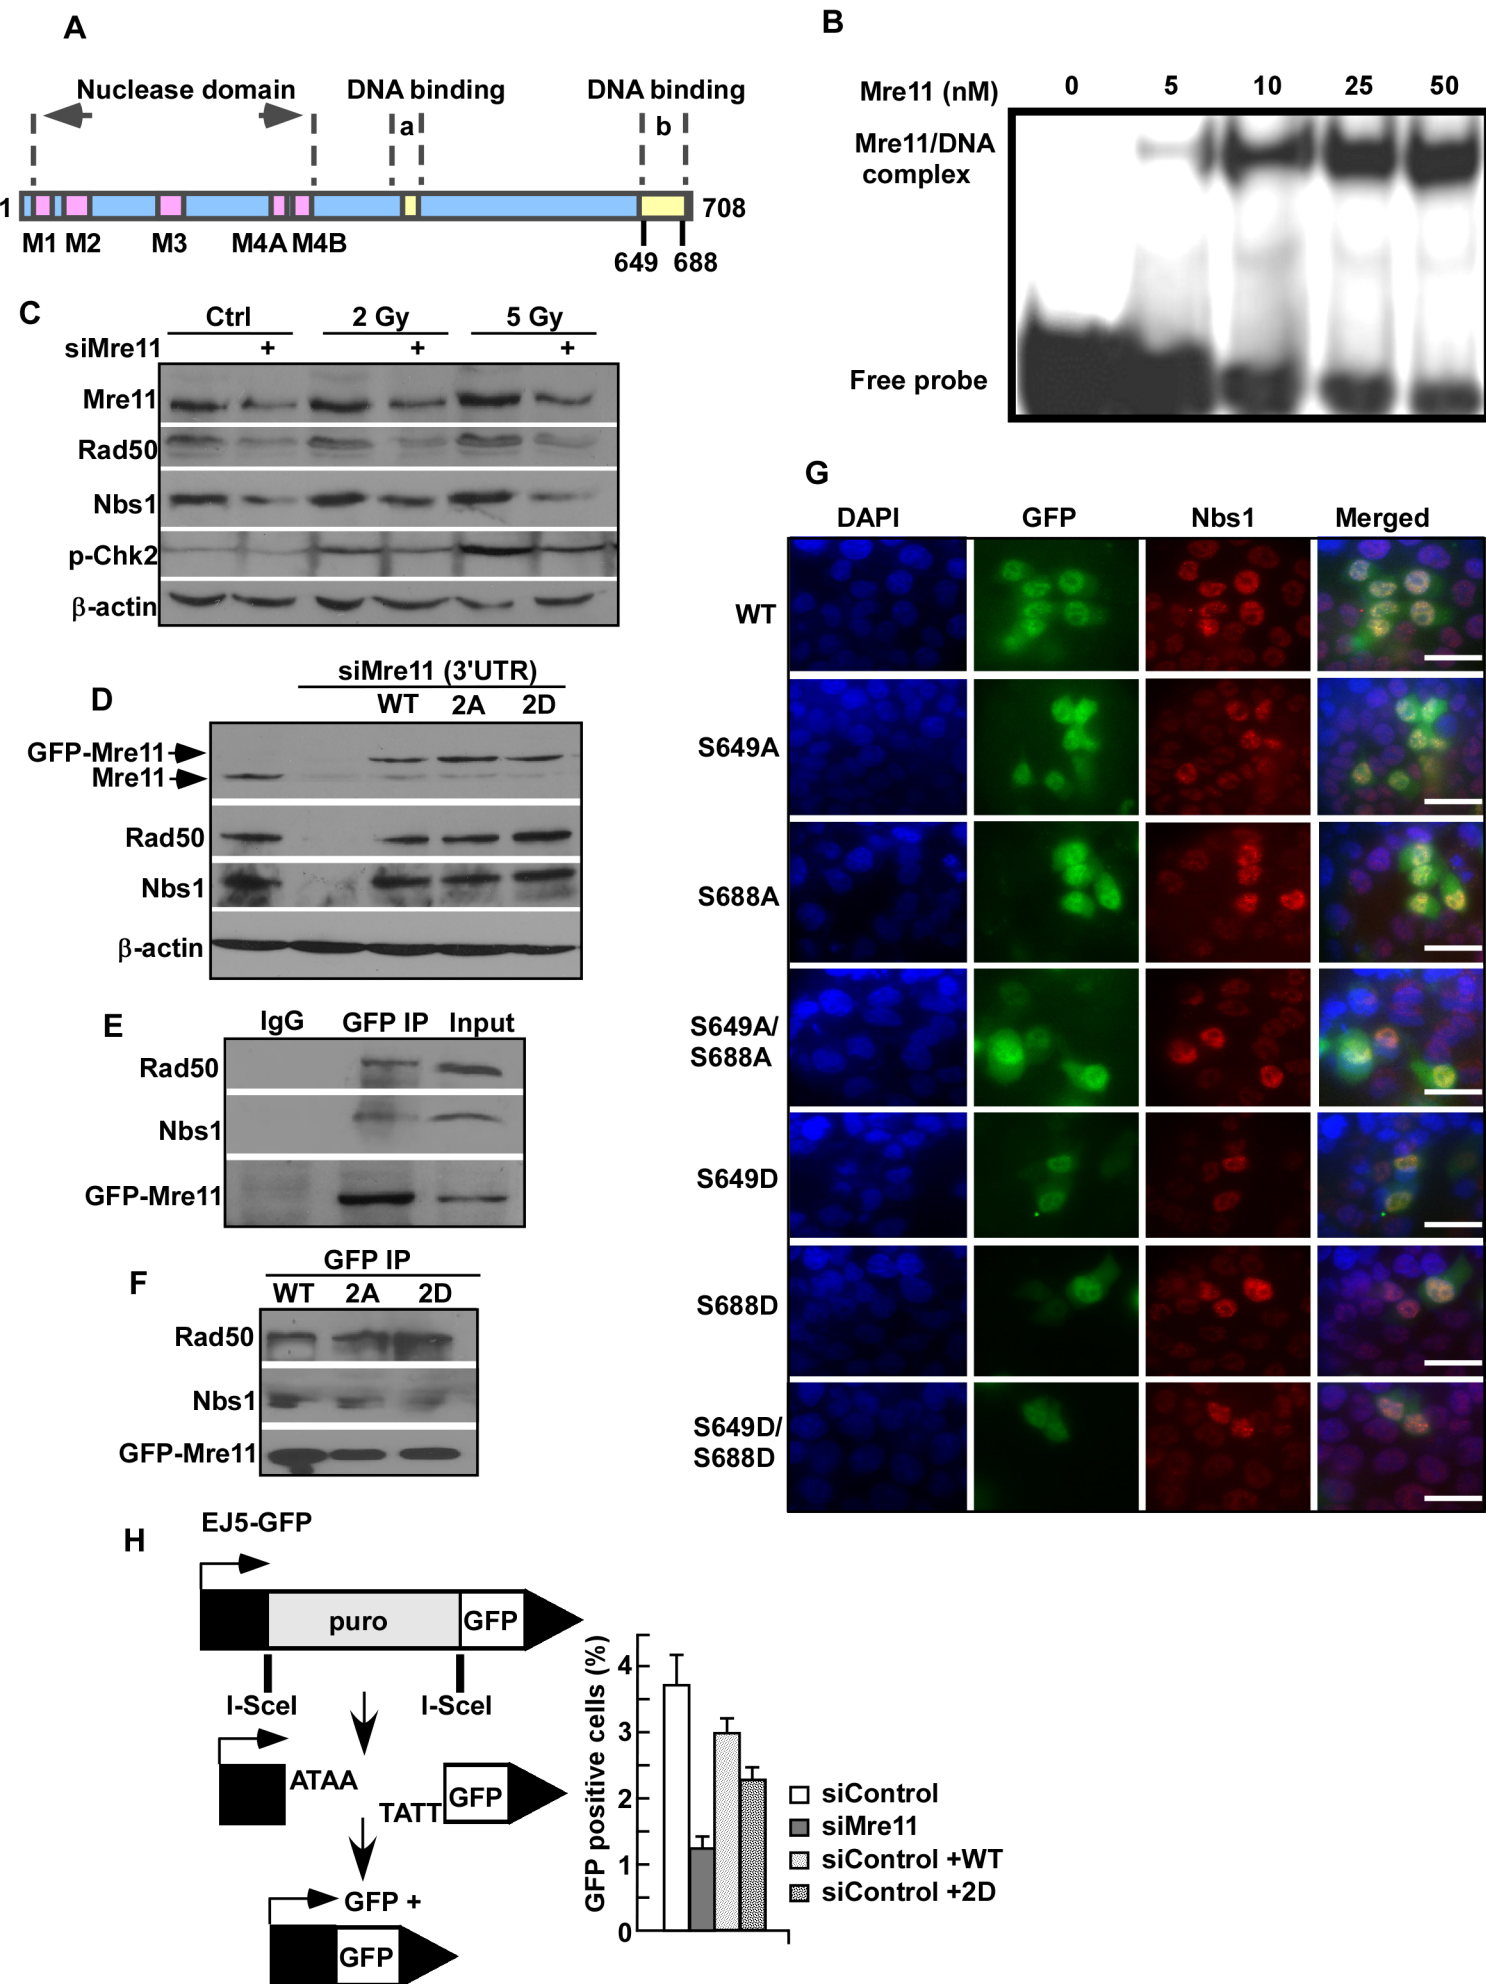

Supplement: NIHMS871843-supplement-5.pdf [file NIHMS871843-supplement-5.pdf]
